# Supplementary material
Source: PubMed Central journal article supplement (PMC3486445)
Supplement: JVI.01873-12_zjv022126784so1.pdf [file JVI.01873-12_zjv022126784so1.pdf]

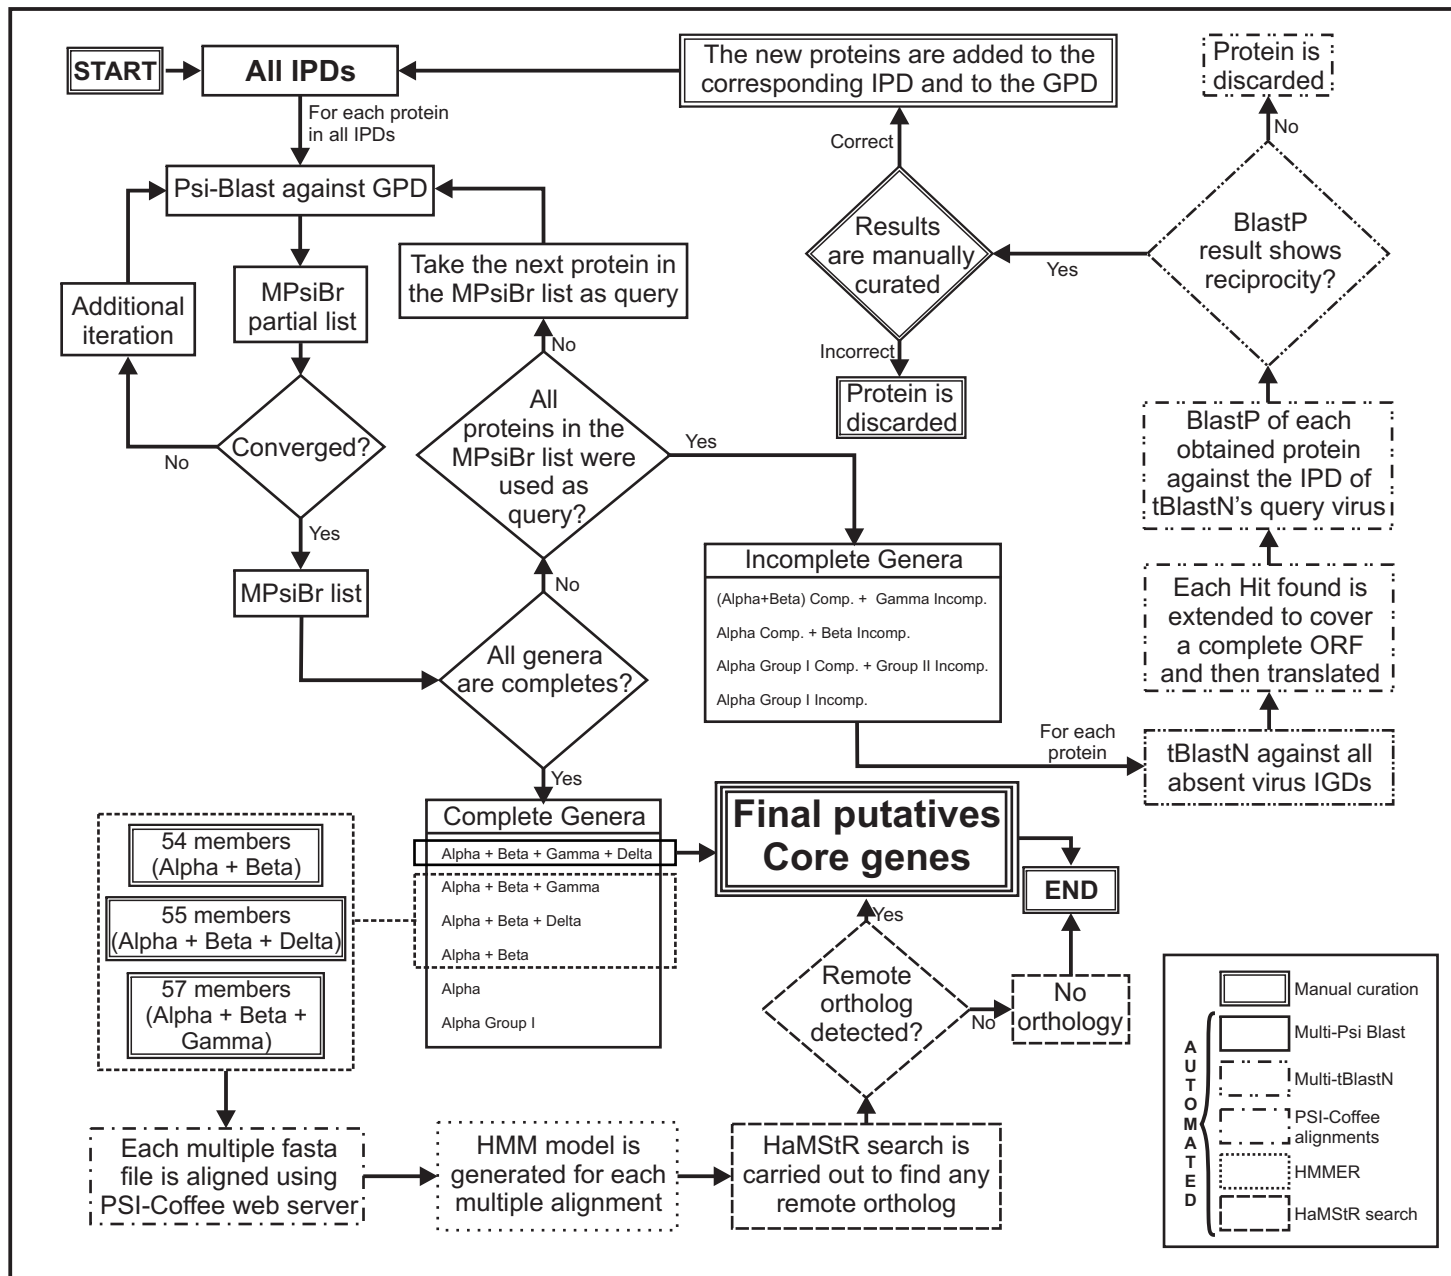

**Supplemental Figure 1. Orthologs search.** The flowchart shows the methodology used to find new orthologous proteins in the family *Baculoviridae*. The boxes with continuous lines indicate the application of the multi Psi-Blast routine, whereas the boxes with dash-dot lines refer to the multi tBlastN/BlastP routines; both are steps contained in the *ad hoc* software. The double line boxes indicate decisions or actions that should be taken by the user. The rectangle with dash-dot line indicates the use of PSI-Coffee web server for making all the alignments; the dotted rectangle represents the HMMER software application for making hidden Markov models; and the dashed boxes refer to the use of the HaMStR software for remote orthology searching.

**Table 1. Baculovirus complete genomes**

|                                        | Name                                     | Abbreviation                  | Accession number | Code      |
|----------------------------------------|------------------------------------------|-------------------------------|------------------|-----------|
| <b>Alphabaculovirus (Group I)</b>      | <i>Antheraea pernyi</i> NPV-Z            | AnpeNPV-Z                     | NC_008035        | APN       |
|                                        | <i>Antheraea pernyi</i> NPV-L2           | AnpeNPV-L2                    | EF207986         | AP2       |
|                                        | <i>Anticarsia gemmatalis</i> MNPV-2D     | AgMNPV-2D                     | NC_008520        | AGN       |
|                                        | <i>Autographa californica</i> MNPV       | AcMNPV                        | NC_001623        | ACN       |
|                                        | <i>Bombyx mori</i> NPV                   | BmNPV                         | NC_001962        | BMN       |
|                                        | <i>Bombyx mandarina</i> NPV              | BomaNPV                       | NC_012672        | BON       |
|                                        | <i>Choristoneura fumiferana</i> DEF MNPV | CfDEFMNPV                     | NC_005137        | CDN       |
|                                        | <i>Choristoneura fumiferana</i> MNPV     | CfMNPV                        | NC_004778        | CFN       |
|                                        | <i>Epiphyas postvittana</i> NPV          | EppoNPV                       | NC_003083        | EPN       |
|                                        | <i>Hyphantria cunea</i> NPV              | HycuNPV                       | NC_007767        | HCN       |
|                                        | <i>Maruca vitrata</i> MNPV               | MaviMNPV                      | NC_008725        | MVN       |
|                                        | <i>Orgyia pseudotsugata</i> MNPV         | OpMNPV                        | NC_001875        | OPN       |
|                                        | <i>Plutella xylostella</i> MNPV          | PlxyMNPV                      | NC_008349        | PXN       |
|                                        | <i>Rachiplusia ou</i> MNPV               | RoMNPV                        | NC_004323        | RON       |
| <b>Alphabaculovirus (Group II)</b>     | <i>Adoxophyes honmai</i> NPV             | AdhoNPV                       | NC_004690        | AHN       |
|                                        | <i>Adoxophyes orana</i> NPV              | AdorNPV                       | NC_011423        | AON       |
|                                        | <i>Agrotis ipsilon</i> NPV               | AgipNPV                       | NC_011345        | AIN       |
|                                        | <i>Agrotis segetum</i> NPV               | AgseNPV                       | NC_007921        | ASN       |
|                                        | <i>Apocheima cinerarium</i> NPV          | ApciNPV                       | FJ914221         | APO       |
|                                        | <i>Chrysodeixis chalcites</i> NPV        | ChChNPV                       | NC_007151        | CCN       |
|                                        | <i>Clanis bilineata</i> NPV              | CibiNPV                       | NC_008293        | CBN       |
|                                        | <i>Ectropis obliqua</i> NPV              | EcobNPV                       | NC_008586        | EON       |
|                                        | <i>Euproctis pseudoconspersa</i> NPV     | EupsNPV                       | NC_012639        | EUN       |
|                                        | <i>Helicoverpa armigera</i> NPV-C1       | HearNPV-C1                    | NC_003094        | HA1       |
|                                        | <i>Helicoverpa armigera</i> NPV-G4       | HearNPV-G4                    | NC_002654        | HA4       |
|                                        | <i>Helicoverpa armigera</i> MNPV         | HearMNPV                      | NC_011615        | HAN       |
|                                        | <i>Helicoverpa armigera</i> SNPV-NNg1    | HearSNPV-NNg1                 | NC_011354        | HAS       |
|                                        | <i>Helicoverpa zea</i> SNPV              | HzSNPV                        | NC_003349        | HZN       |
|                                        | <i>Leucania separata</i> NPV-AH1         | LeseNPV-AH1                   | NC_008348        | LSN       |
|                                        | <i>Lymantria dispar</i> MNPV             | LdMNPV                        | NC_001973        | LDN       |
|                                        | <i>Lymantria xyliina</i> MNPV            | LyxyMNPV                      | NC_013953        | LXN       |
|                                        | <i>Mamestra configurata</i> NPV-A 90-2   | MacoNPV-A 90-2                | NC_003529        | MCN       |
|                                        | <i>Mamestra configurata</i> NPV-A 90-4   | MacoNPV-A 90-4                | AF539999         | MC4       |
|                                        | <i>Mamestra configurata</i> NPV-B        | MacoNPV-B                     | NC_004117        | MCB       |
|                                        | <i>Orgyia leucostigma</i> NPV            | OrleNPV                       | NC_010276        | OLN       |
| <i>Spodoptera exigua</i> MNPV          | SeMNPV                                   | NC_002169                     | SEN              |           |
| <i>Spodoptera frugiperda</i> MNPV-3AP2 | SfMNPV-3AP2                              | NC_009011                     | SF2              |           |
| <i>Spodoptera frugiperda</i> MNPV-19   | SfMNPV-19                                | EU258200                      | SF9              |           |
| <i>Spodoptera litura</i> NPV-II        | SpliNPV-II                               | NC_011616                     | SLN              |           |
| <i>Spodoptera litura</i> NPV-G2        | SpliNPV-G2                               | NC_003102                     | SL2              |           |
| <i>Trichoplusia ni</i> SNPV            | TnSNPV                                   | NC_007383                     | TNN              |           |
| <b>Betabaculovirus</b>                 | <i>Adoxophyes orana</i> GV               | AdorGV                        | NC_005038        | AOG       |
|                                        | <i>Agrotis segetum</i> GV                | AgseGV                        | NC_005839        | ASG       |
|                                        | <i>Choristoneura occidentalis</i> GV     | ChocGV                        | NC_008168        | COG       |
|                                        | <i>Clostera anachoreta</i> GV            | ClanGV                        | NC_015398        | CAG       |
|                                        | <i>Cryptophlebia leucotreta</i> GV       | CrleGV                        | NC_005068        | CLG       |
|                                        | <i>Cydia pomonella</i> GV                | CpGV                          | NC_002816        | CPG       |
|                                        | <i>Helicoverpa armigera</i> GV           | HearGV                        | NC_010240        | HAG       |
|                                        | <i>Phthorimea operculella</i> GV         | PhopGV                        | NC_004062        | POG       |
|                                        | <i>Plutella xylostella</i> GV            | PlxyGV                        | NC_002593        | PXG       |
|                                        | <i>Pieris rapae</i> GV                   | PiraGV                        | NC_013797        | PRG       |
|                                        | <i>Pseudaletia unipuncta</i> GV-Hawaii   | PsunGV                        | NC_013772        | PSG       |
|                                        | <i>Spodoptera litura</i> GV-K1           | SpliGV                        | NC_009503        | SLG       |
|                                        | <i>Xestia c-nigrum</i> GV                | XnGV                          | NC_002331        | XCG       |
|                                        | <b>Gamma</b>                             | <i>Neodiprion abietis</i> NPV | NeabNPV          | NC_008252 |
| <i>Neodiprion lecontei</i> NPV         |                                          | NeleNPV                       | NC_005906        | NLN       |
| <i>Neodiprion sertifer</i> NPV         |                                          | NeseNPV                       | NC_005905        | NSN       |
| <b>Delta</b>                           | <i>Culex nigripalpus</i> NPV             | CuniNPV                       | NC_003084        | CNN       |

This table contains all of the baculoviruses used in bioinformatic studies, sorted by genus (and within them by alphabetical order). MNPV is the abbreviation of multicapsid nucleopolyhedrovirus; NPV is the abbreviation of nucleopolyhedrovirus; SNPV is the abbreviation of single nucleopolyhedrovirus; GV is the abbreviation of granulovirus. The accession numbers are from National Center for Biotechnology Information (NCBI, <http://www.ncbi.nlm.nih.gov>) and correspond to the sequences of complete genomes. Code is a three letter abbreviation used in some pictures.
